# Supplementary material
Source: bioRxiv or medRxiv preprint supplement (https://medrxiv.org/highwire/filestream/86902/field_highwire_adjunct_files/4/2020.05.31.20118554-5.pdf)
Supplement: Supplementary file [file 2020.05.31.20118554-5.pdf]

### Immobilization with NC

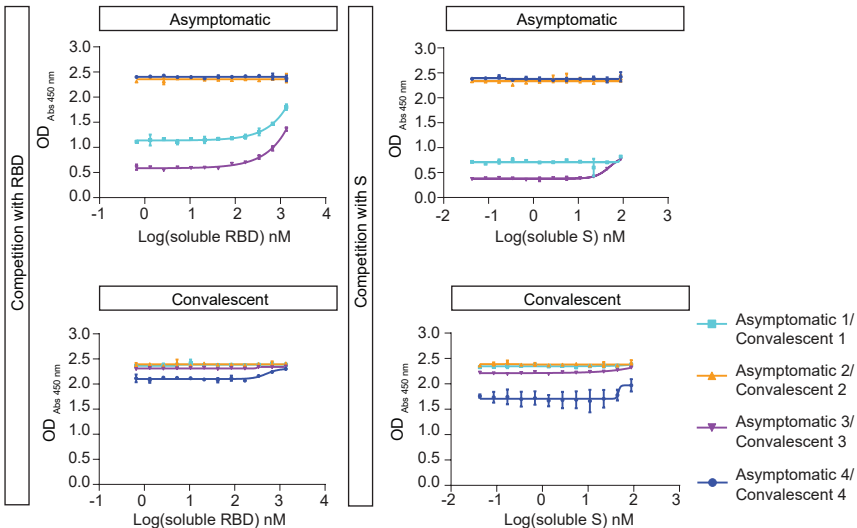

Fig. S5
